# Supplementary material
Source: publisher site journal article supplement (https://www.dovepress.com/get_supplementary_file.php?f=371882.xlsx)
Supplement: Supplementary file 1 [file get_supplementary_file.php]

## Sheet: PROMIS Domain Framework
Supplementary Table 1. PROMIS Domain Framework (July 2022)
Note: Table is reprinted with permission of the PROMIS Health Organization. Downloaded from www.healthmeasures.net on July 20, 2022.						Unless indicated otherwise in the Notes column, all rows reflect calibrated item banks
Respondent	Category	Sub-Category	Domain	Sub-Domain	Definition	Notes
Physical Health
Adult	Physical Health	Symptoms	Pain – Behavior		Behaviors that typically indicate to others that an individual is experiencing pain. These actions or reactions can be verbal or nonverbal, and involuntary or deliberate.
Adult	Physical Health	Symptoms	Pain – Interference		Consequences of pain on relevant aspects of one’s life. This includes the extent to which pain hinders engagement with social, cognitive, emotional, physical, and recreational activities.
Adult	Physical Health	Symptoms	Pain Intensity		How much a person hurts
Adult	Physical Health	Symptoms	Pain Quality – Neuropathic Pain		Caused by damage to the peripheral somatosensory nervous system, part of the nervous system involved in bodily feelings. This damage can be caused by an abnormality, trauma or disease.
Adult	Physical Health	Symptoms	Pain Quality – Nociceptive Pain		Caused by stimulation of peripheral nerve fibers (nociceptors) in the context of a normally functioning somatosensory nervous system.
Adult	Physical Health	Symptoms	Fatigue		Range of symptoms, from mild subjective feelings of tiredness to an overwhelming, debilitating, and sustained sense of exhaustion that likely decreases one’s ability to execute daily activities and function normally in family or social roles.
Adult	Physical Health	Symptoms	Itch – Interference		General issues related to quality of life impairment from itch (pruritis).
Adult	Physical Health	Symptoms	Itch – Quality		Assesses the subjective description of the sensation of itch with a checklist.
Adult	Physical Health	Symptoms	Itch – Scratching Behavior		Quality of life impairment from scratching behavior and the physical manifestations of itch (pruritis).
Adult	Physical Health	Symptoms	Itch – Severity		Characteristics of itch, including intensity, frequency, and time of occurrence.
Adult	Physical Health	Symptoms	Itch – Activity & Clothing		Activity and clothing related quality of life impairment from itch (pruritis).
Adult	Physical Health	Symptoms	Itch – Mood & Sleep		Mood and sleep related quality of life impairment from itch (pruritis).
Adult	Physical Health	Symptoms	Itch – Triggers		Assesses the subjective description of the triggers of itch with a checklist.
Adult	Physical Health	Symptoms	Dyspnea – Activity Motivation**		An adult’s relative dispositional tendency or preference toward being active or sedentary.	**uncalibrated item pool
Adult	Physical Health	Symptoms	Dyspnea – Activity Requirements**		Impact of an adult's environment on their physical activity levels and external activity demands on an adult, such as work outside the home and aspects of the home environment (e.g., stairs).	**uncalibrated item pool
Adult	Physical Health	Symptoms	Dyspnea – Airborne Exposure**		Environmental factors related to dyspnea, including exposure to airborne allergens, pollutants and smoke, and whether or not an adult is exposed to airborne factors in their environment that could impact their shortness of breath.	**uncalibrated item pool
Adult	Physical Health	Symptoms	Dyspnea – Assistive Devices**		Availability and use of assistive devices (e.g., cane, grab bar, or oxygen) and whether or not an individual uses such devices.	**uncalibrated item pool
Adult	Physical Health	Symptoms	Dyspnea – Characteristics**		Various descriptive aspects of a person’s experience of dyspnea, including quantitative and qualitative descriptions of the severity and intensity of shortness of breath as well as its frequency and duration.	**uncalibrated item pool
Adult	Physical Health	Symptoms	Dyspnea – Emotional Response**		Emotions experienced related to dyspnea, including embarrassment, fear and worry, and how individuals may react emotionally to their shortness of breath.	**uncalibrated item pool
Adult	Physical Health	Symptoms	Dyspnea – Functional Limitations		Impact of dyspnea (i.e. shortness of breath or difficulty breathing) on an adult’s ability to function while performing specific daily activities (e.g., dressing oneself without help, preparing meals, walking up 20 stairs).
Adult	Physical Health	Symptoms	Dyspnea – Severity		Severity of shortness of breath or difficulty breathing an adult experiences in response to various specific activities (the same activities assessed in Dyspnea Functional Limitations).
Adult	Physical Health	Symptoms	Dyspnea – Task Avoidance**		An adult's decision to stop engaging in certain activities when the breathing discomfort associated with continuing the activity can no longer be tolerated.	**uncalibrated item pool
Adult	Physical Health	Symptoms	Dyspnea – Time Extension**		Whether there has been a meaningful increase or decrease in the duration of time needed by an adult to perform a given task in the past 7 days (compared to 3 months ago) due to shortness of breath.	**uncalibrated item pool
Adult	Physical Health	Symptoms	Gastrointestinal – Belly Pain		Severity of belly pain in adult populations . The intensity, nature (sharp vs. dull), frequency, bothersomeness, and predictability (e.g. ability to tell in advance when a pain episode would occur) all contribute towards belly pain severity.
Adult	Physical Health	Symptoms	Gastrointestinal – Constipation		Frequency and intensity of incomplete evacuation, rectal pain, straining, and hard stools, as well as the need for manual extraction of stool.
Adult	Physical Health	Symptoms	Gastrointestinal – Diarrhea		Frequency, form, bothersomeness, impact, controllability, and predictability of bowel urgency
Adult	Physical Health	Symptoms	Gastrointestinal – Disrupted Swallowing		Difficulty swallowing solid and soft foods, liquids, and pills as well as throat/chest pain and the sensation of food being stuck in the throat/chest.
Adult	Physical Health	Symptoms	Gastrointestinal – Gas and Bloating		Frequency and intensity/severity of bloating (i.e. feeling pressure or fullness), bloating appearance (i.e. belly swollen or larger than usual size), flatulence (i.e. passing gas), and abdominal sounds (i.e. gurgling or rumbling).
Adult	Physical Health	Symptoms	Gastrointestinal – Gastroesophageal Reflux		Symptoms associated with stomach contents leaking backwards from the stomach into the esophagus.
Adult	Physical Health	Symptoms	Gastrointestinal – Nausea and Vomiting		Frequency of vomiting, nausea, and poor appetite, as well as the predictability of nausea.
Adult	Physical Health	Symptoms	Gastrointestinal – Bowel Incontinence		Frequency of bowel incontinence, soiling, and gas incontinence (i.e. stool leakage while passing gas)
Adult	Physical Health	Function	Physical Function		Self-reported capability rather than actual performance of physical activities. This includes the functioning of one’s upper extremities (dexterity), lower extremities (walking or mobility), and central regions (neck, back), as well as instrumental activities of daily living, such as running errands.
Adult	Physical Health	Function	Physical Function	Mobility	Activities of physical mobility such as getting out of bed or a chair to activities such as running.
Adult	Physical Health	Function	Physical Function	Upper Extremity	Activities that require use of the upper extremity including shoulder, arm, and hand activities. Examples include writing, using buttons, or opening containers.
Adult	Physical Health	Function	Physical Function for Samples with Mobility Aid Users		For samples that may include individuals who use mobility aids such as wheelchairs.
Adult	Physical Health	Function	Sleep Disturbance		Perceptions of sleep quality, sleep depth, and restoration associated with sleep.
Adult	Physical Health	Function	Sleep-Related Impairment		Perceptions of alertness, sleepiness, and tiredness during usual waking hours, and the perceived functional impairments during wakefulness associated with sleep problems or impaired alertness.
Adult	Physical Health	Function	Sexual Function and Satisfaction	Anal Discomfort with Sexual Activity (for Sexually Active People)	Anal irritation, pain, or bleeding during or after anal sex
Adult	Physical Health	Function	Sexual Function and Satisfaction	Bother Regarding Sexual Function - Female - Male	The extent to which people were bothered by aspects of sexual functioning
Adult	Physical Health	Function	Sexual Function and Satisfaction	Erectile Function (for Sexually Active Men)	Ability to achieve and maintain an erection for sexual activity.
Adult	Physical Health	Function	Sexual Function and Satisfaction	Factors Interfering with Sexual Satisfaction	Perception of the degree to which various factors affect satisfaction with sex life. These factors include symptoms of disease and side effects from treatment and other issues that have been identified by participants.
Adult	Physical Health	Function	Sexual Function and Satisfaction	Interest in Sexual Activity	Conscious awareness of wanting to engage in sexual activity.
Adult	Physical Health	Function	Sexual Function and Satisfaction	Oral Discomfort with Sexual Activity (for Sexually Active People)	The degree of physical discomfort in the mouth, including pain and/or irritation, experienced with sexual activity
Adult	Physical Health	Function	Sexual Function and Satisfaction	Oral Dryness with Sexual Activity (for Sexually Active People)	The lack of saliva in the mouth experienced with sexual activity
Adult	Physical Health	Function	Sexual Function and Satisfaction	Orgasm – Ability (for Sexually Active People)	The degree to which the person has experienced a satisfying climax.
Adult	Physical Health	Function	Sexual Function and Satisfaction	Orgasm - Pleasure (for Sexually Active People)	How pleasurable or satisfying the person's orgasms have felt.
Adult	Physical Health	Function	Sexual Function and Satisfaction	Satisfaction with Sex Life	An overall evaluation of his or her sex life. No limitation is placed on what the person includes in his or her definition of “sex life.”
Adult	Physical Health	Function	Sexual Function and Satisfaction	Screeners	Asks about sex (gender), whether people are in a relationship that could involve sexual activity, and whether they have had any type of sexual activity with a partner in the past 30 days.
Adult	Physical Health	Function	Sexual Function and Satisfaction	Sexual Activities - Female - Male	Frequency of engaging in specific intimate or sexual behaviors, either alone or with a partner.
Adult	Physical Health	Function	Sexual Function and Satisfaction	Therapeutic Aids for Sexual Activity - Female - Male	Use of hormones, personal lubrications, medications, or devices intended to allow for or improve sexual function.
Adult	Physical Health	Function	Sexual Function and Satisfaction	Vaginal Discomfort with Sexual Activity (for Sexually Active Women)	Physical discomfort of the vagina during and immediately following sexual activity.
Adult	Physical Health	Function	Sexual Function and Satisfaction	Vaginal Lubrication for Sexual Activity (for Sexually Active Women)	Wetness or dryness of the vagina during sexual activity.
Adult	Physical Health	Function	Sexual Function and Satisfaction	Vulvar Discomfort with Sexual Activity – Clitoral (for Sexually Active Women)	The degree of physical discomfort, including pain, of the clitoris experienced with sexual activity
Adult	Physical Health	Function	Sexual Function and Satisfaction	Vulvar Discomfort with Sexual Activity – Labial (for Sexually Active Women)	The degree of physical discomfort, including pain, of the labia experienced with sexual activity
Ages 8-17	Physical Health	Symptoms	Pain – Behavior		Behaviors that typically indicate to others that an individual is experiencing pain. These actions or reactions can be verbal or nonverbal, and involuntary or deliberate.
Ages 8-17	Physical Health	Symptoms	Pain – Interference		Consequences of pain on relevant aspects of one’s life. This includes the extent to which pain hinders engagement with social, cognitive, emotional, physical, and recreational activities.
Ages 8-17	Physical Health	Symptoms	Pain Quality - Affective		Specific physical sensations and affective components associated with pain. Because pain can be felt and described in so many ways, this category of pain contains a variety of attributes, such as perceived temperature (e.g., cold), sensations (e.g., throbbing), and perceived affective qualities of pain (e.g., uncomfortable).
Ages 8-17	Physical Health	Symptoms	Pain Quality - Sensory		Specific physical sensations and affective components associated with pain. Because pain can be felt and described in so many ways, this category of pain contains a variety of attributes, such as perceived temperature (e.g., cold), sensations (e.g., throbbing), and perceived affective qualities of pain (e.g., uncomfortable).
Ages 8-17	Physical Health	Symptoms	Pain Quality		Specific physical sensations and affective components associated with pain. Because pain can be felt and described in so many ways, this category of pain contains a variety of attributes, such as perceived temperature (e.g., cold), sensations (e.g., throbbing), and perceived affective qualities of pain (e.g., uncomfortable).
Ages 8-17	Physical Health	Symptoms	Fatigue		Range of symptoms, from mild subjective feelings of tiredness to an overwhelming, debilitating, and sustained sense of exhaustion.
Ages 8-17	Physical Health	Symptoms	Itch (PIQ-C)		Assesses itch (pruritus) symptoms and their impact on children’s daily living. The PIQ-C includes items for children with skin conditions.
Ages 8-17	Physical Health	Symptoms	Asthma Impact		Asthma-specific symptoms that include cough, wheeze, shortness of breath, and avoidance of triggers. Also, asthma-associated impacts such as missing school or activities with other children.
Ages 8-17	Physical Health	Symptoms	Physical Stress Experience		The physically experienced sensations associated with responses to internal or external challenges including arousal, agitation, pain, and gastrointestinal distress.
Ages 8-17	Physical Health	Function	Physical Function	Mobility	Activities of physical mobility such as getting out of bed or a chair to activities such as running.
Ages 8-17	Physical Health	Function	Physical Function	Upper Extremity	Activities that require use of the upper extremity including shoulder, arm, and hand activities.
Ages 8-17	Physical Health	Function	Sleep-Related Disturbance		Assesses reported thoughts of one's sleep quality, and perceived difficulties with falling or staying asleep. Conceptual facets include sleep quality, sleep onset, and sleep continuity.
Ages 8-17	Physical Health	Function	Sleep-Related Impairment		Assesses perceptions of sleepiness during usual awake hours and reported impairments during the day associated with sleep problems or daytime sleepiness. Conceptual facets include daytime sleepiness, sleep offset, impact: cognitive, impact: activities, and impact: emotional.
Ages 8-17	Physical Health	Function	Physical Activity		Self-reported capability rather than actual performance of physical activities. This includes the functioning of one’s upper extremities (dexterity), lower extremities (walking or mobility), and central regions (neck, back), as well as instrumental activities of daily living.
Ages 8-17	Physical Health	Function	Strength Impact		A child's capacity to perform functional activities of daily living that require significant amount of muscle force generation.
Proxy Ages 1-5	Physical Health	Function	Sleep-Related Disturbance		Sleep quality, sleep onset (difficulties falling asleep), sleep continuity (difficulties staying asleep).
Proxy Ages 1-5	Physical Health	Function	Sleep-Related Impairment		Perceptions of sleepiness during usual awake hours and reported impairments during the day associated with sleep problems or daytime sleepiness.
Proxy Ages 5-17	Physical Health	Symptoms	Pain – Behavior		Behaviors that typically indicate to others that an individual is experiencing pain. These actions or reactions can be verbal or nonverbal, and involuntary or deliberate.
Proxy Ages 5-17	Physical Health	Symptoms	Pain – Interference		Consequences of pain on relevant aspects of one’s life. This includes the extent to which pain hinders engagement with social, cognitive, emotional, physical, and recreational activities.
Proxy Ages 5-17	Physical Health	Symptoms	Fatigue		Range of symptoms, from mild subjective feelings of tiredness to an overwhelming, debilitating, and sustained sense of exhaustion.
Proxy Ages 5-17	Physical Health	Symptoms	Itch (PIQ-C)		Assesses parents’ perception of itch (pruritus) symptoms and their impact on children’s daily living. The proxy PIQ-C includes items for parents' perception of their children with skin conditions.
Proxy Ages 5-17	Physical Health	Symptoms	Asthma Impact		Asthma-specific symptoms that include cough, wheeze, shortness of breath, and avoidance of triggers. Also, asthma-associated impacts such as missing school or activities with other children.
Proxy Ages 5-17	Physical Health	Symptoms	Physical Stress Experience		The physically experienced sensations associated with responses to internal or external challenges including arousal, agitation, pain, and gastrointestinal distress.
Proxy Ages 5-17	Physical Health	Function	Physical Function	Mobility	Activities of physical mobility such as getting out of bed or a chair to activities such as running.
Proxy Ages 5-17	Physical Health	Function	Physical Function	Upper Extremity	Activities that require use of the upper extremity including shoulder, arm, and hand activities.
Proxy Ages 5-17	Physical Health	Function	Sleep-Related Disturbance		Sleep quality, sleep onset (difficulties falling asleep), sleep continuity (difficulties staying asleep).
Proxy Ages 5-17	Physical Health	Function	Sleep-Related Impairment		Perceptions of sleepiness during usual awake hours and reported impairments during the day associated with sleep problems or daytime sleepiness.
Proxy Ages 5-17	Physical Health	Function	Physical Activity		Self-reported capability rather than actual performance of physical activities. This includes the functioning of one’s upper extremities (dexterity), lower extremities (walking or mobility), and central regions (neck, back), as well as instrumental activities of daily living.
Proxy Ages 5-17	Physical Health	Function	Strength Impact		A child's capacity to perform functional activities of daily living that require significant amount of muscle force generation.
Mental Health
Adult	Mental Health	Affect	Emotional Distress – Anxiety		Fear (fearfulness, panic), anxious misery (worry, dread), hyperarousal (tension, nervousness, restlessness), and somatic symptoms related to arousal (racing heart, dizziness).
Adult	Mental Health	Affect	Emotional Distress – Depression		Negative mood (sadness, guilt), views of self (self- criticism,worthlessness), and social cognition (loneliness, interpersonal alienation), as well as decreased positive affect and engagement (loss of interest, meaning, and purpose).
Adult	Mental Health	Affect	Emotional Distress – Anger		Angry mood (irritability, frustration), negative social cognitions (interpersonal sensitivity, envy, disagreeableness), and efforts to control anger.
Adult	Mental Health	Affect	General Life Satisfaction		One’s cognitive evaluation of life experiences and whether one likes his/her life or not.
Adult	Mental Health	Affect	Meaning and Purpose		A sense that life has purpose and there are good reasons for living, including hopefulness, optimism, goal-directedness, and feelings that one’s life is worthy.
Adult	Mental Health	Affect	Positive Affect		Feelings that reflect a level of pleasurable engagement with the environment, such as happiness, joy, excitement, enthusiasm, and contentment.
Adult	Mental Health	Affect	Psychosocial Illness Impact – Negative		Direct negative psychosocial effect of cancer, distinct from general emotional distress.
Adult	Mental Health	Affect	Psychosocial Illness Impact – Positive		Positive psychosocial (emotional and social) outcomes of illness, previously conceptualized in various ways including post-traumatic growth, benefit-finding, and meaning making.
Adult	Mental Health	Behavior	Alcohol – Alcohol Use		Drinking patterns, cue-based drinking, cravings to drink, and efforts to control drinking that indicate problematic drinking, particularly at the high end of the severity continuum.
Adult	Mental Health	Behavior	Alcohol – Negative Consequences		Negative personal outcomes of alcohol use over the past 30 days. These items cover physical, mental, and social consequences of drinking.
Adult	Mental Health	Behavior	Alcohol – Negative Expectancies		General attitudes about negative outcomes of alcohol use. These items cover physical, mental, and social negative expectancies of drinking.
Adult	Mental Health	Behavior	Alcohol – Positive Consequences		Positive personal outcomes of alcohol use over the past 30 days. These items cover physical, mental, and social consequences of drinking.
Adult	Mental Health	Behavior	Alcohol – Positive Expectancies		General attitudes about positive outcomes of alcohol use. These items cover physical, mental, and social positive expectancies of drinking.
Adult	Mental Health	Behavior	Smoking – Coping Expectancies All Smokers; Daily Smokers; Nondaily Smokers		Using smoking as a way to cope with various types of negative affect, affective consequences of not smoking, and the extent to which negative affect triggers smoking.
Adult	Mental Health	Behavior	Smoking – Emotional/Sensory Expectancies All Smokers; Daily Smokers; Nondaily Smokers		Improved cognitive abilities (e.g., concentration), positive affective states (e.g., relaxation, contentment), and enjoyable sensorimotor sensations (e.g., from the ritual of lighting up a cigarette, smelling the cigarette, inhaling the smoke) that are experienced as a result of smoking.
Adult	Mental Health	Behavior	Smoking – Negative Health Expectancies All Smokers; Daily Smokers; Nondaily Smokers		Health-related outcome expectancies of smoking (e.g., Smoking gives me a headache) and quitting (e.g., if I quit smoking I will breathe easier), and emotions such as worry (e.g., about developing serious health problems in the future).
Adult	Mental Health	Behavior	Smoking – Negative Psychosocial Expectancies All Smokers; Daily Smokers; Nondaily Smokers		Friend and family disapproval (e.g., if I quit smoking my friends will respect me more), self-disapproval (e.g., I get upset when I think about my smoking), and internalization of social norms (e.g., I feel uncomfortable smoking around kids).
Adult	Mental Health	Behavior	Smoking – Nicotine Dependence All Smokers; Daily Smokers; Nondaily Smokers		Tolerance, craving, withdrawal severity, temptations to smoke, and smoking as a behavioral priority.
Adult	Mental Health	Behavior	Smoking – Social Motivations All Smokers; Daily Smokers; Nondaily Smokers		Beliefs that: (a) smoking makes social situations more comfortable or enjoyable; (b) smoking provides a sense of camaraderie and belonging; (c) quitting smoking can negatively impact existing relationships with smokers; and (d) being in certain social situations increases smoking or the temptation to smoke.
Adult	Mental Health	Behavior	Substance Use - Appeal Past 30 Days; Past 3 months		Perceived positive aspects of substance use, including both increasing positive emotions (e.g., feeling happy and social) and alleviating negative emotions (e.g., reducing depression and anxiety). Requires a screening question to document the presence of some use: “In the past 30 days, have you used drugs other than alcohol or your prescribed medications?”
Adult	Mental Health	Behavior	Substance Use - Prescription Pain Medication Misuse		Abuse of prescription pain medication. Requires a screening question to document the presence of a prescription for use: “In the past 3 months, did you have a prescription for pain medication?”
Adult	Mental Health	Behavior	Substance Use - Severity Past 30 Days; Past 3 months		Severity of substance use in adults. Requires a screening question to document the presence of some use: “In the past 3 months, have you used drugs other than alcohol or your prescribed medications?”
Adult	Mental Health	Cognition	Cognitive Function		Mental acuity, concentration, verbal and nonverbal memory, verbal fluency, and perceived changes in these cognitive functions. The extent to which cognitive impairments interfere with daily functioning, whether other people observe cognitive impairments, and the impact of cognitive dysfunction on quality of life are also assessed.
Adult	Mental Health	Cognition	Cognitive Function - Abilities		Patient-perceived functional abilities with regard to cognitive tasks, including the perception that one’s cognitive ability with regard to the domain of inquiry (e.g.concentration, memory) has not changed.
Adult	Mental Health	Cognition	Self-Efficacy - General		Confidence in ability to deal effectively with a variety of stressful situations.
Adult	Mental Health	Cognition	Self-Efficacy for Managing Chronic Conditions – Manage Emotions		Confidence to manage/control symptoms of anxiety, depression, helplessness, discouragement, frustration, disappointment and anger.
Adult	Mental Health	Cognition	Self-Efficacy for Managing Chronic Conditions – Manage Daily Activities		Confidence in performing various activities of daily living (ADLs) without assistance. Items also assess exercise, sexual activities and managing activities in challenging situations (travelling, bad weather).
Adult	Mental Health	Cognition	Self-Efficacy for Managing Chronic Conditions – Manage Meds/Treatment		Confidence in managing medication schedules of different complexity. Managing medication and other treatments in challenging situations such as when travelling, when running out of medication, and when adverse effects are encountered.
Adult	Mental Health	Cognition	Self-Efficacy for Managing Chronic Conditions – Manage Social Interactions		Confidence in participating in social activities and getting help when necessary. Managing communication with others about their medical condition, including communication with health professionals.
Adult	Mental Health	Cognition	Self-Efficacy for Managing Chronic Conditions – Manage Symptoms		Confidence to manage/control their symptoms, to manage their symptoms in different settings and to keep symptoms from interfering with work, sleep, relationships or recreational activities.
Ages 8-17	Mental Health	Affect	Emotional Distress – Anxiety		Fear (fearfulness, panic), anxious misery (worry, dread), hyperarousal (tension, nervousness, restlessness), and somatic symptoms related to arousal (racing heart, dizziness).
Ages 8-17	Mental Health	Affect	Emotional Distress – Depressive Symptoms		Negative mood (sadness, guilt), views of self (self- criticism,worthlessness), and social cognition (loneliness, interpersonal alienation), as well as decreased positive affect and engagement (loss of interest, meaning, and purpose).
Ages 8-17	Mental Health	Affect	Emotional Distress – Anger/Irritability		Angry mood (irritability, frustration), negative social cognitions (interpersonal sensitivity, envy, disagreeableness), and efforts to control anger.
Ages 8-17	Mental Health	Affect	Life Satisfaction		Global and context-specific evaluations of a child’s life. Conceptual facets include global evaluations of life, context-specific evaluations of life, assessments of life conditions, and comparisons of one’s life with others’ lives.
Ages 8-17	Mental Health	Affect	Meaning and Purpose		A child's sense that life has purpose and there are good reasons for living, including hopefulness, optimism, goal-directedness, and feelings that one’s life is worthy.
Ages 8-17	Mental Health	Affect	Positive Affect		A child's momentary positive or rewarding affective experiences, such as feelings and mood associated with pleasure, joy, elation, contentment, pride, affection, happiness, engagement, and excitement.
Ages 8-17	Mental Health	Affect	Psychological Stress Experiences		The thoughts or feelings about self and the world in the context of environmental or internal challenges. Items represent 3 facets of psychological stress reactions: feeling overwhelmed, perceived lack of control of capacity to manage one’s life, and cognitive-perceptual disruption.
Ages 8-17	Mental Health	Cognition	Cognitive Function		Difficulties in cognitive abilities (e.g., memory, attention, and decision making), and difficulties in the application of such abilities to everyday tasks (e.g., planning, organizing, calculating, remembering, and learning).
Proxy Ages 1-5	Mental Health	Affect	Emotional Distress – Anxiety		Fear (fearfulness, panic), anxious misery (worry, dread), hyperarousal (tension, nervousness, restlessness), social/separation anxiety (fear or distress when separating from caregivers), and somatic symptoms related to arousal (racing heart, dizziness).
Proxy Ages 1-5	Mental Health	Affect	Emotional Distress – Depressive Symptoms		Negative mood (sadness, guilt), views of self (self-criticism, worthlessness), and social cognition (loneliness, interpersonal alienation); decreased positive affect, anhedonia (loss of interest, inability to engage in play), and engagement.
Proxy Ages 1-5	Mental Health	Affect	Emotional Distress – Anger/Irritability		Angry mood (irritability, frustration, grouchiness), negative social cognitions (interpersonal sensitivity, envy, disagreeableness), behavior (tantrums), and efforts to control anger.
Proxy Ages 1-5	Mental Health	Affect	Engagement - Curiosity		Young children's emotional, behavioral, and cognitive curiosity and interest, and initiative taking.
Proxy Ages 1-5	Mental Health	Affect	Engagement - Persistence		Young children's sustained engagement and effort in problem solving and completing challenging activities and self-confidence
Proxy Ages 1-5	Mental Health	Affect	Positive Affect		Momentary positive or rewarding affective experiences, such as feelings and mood associated with pleasure, joy, elation, contentment, pride, affection, happiness, engagement, and excitement.
Proxy Ages 1-5	Mental Health	Affect	Self-Regulation – Flexibility		Young children's ability to adapt in response to environmental demands, changes, and expectations.
Proxy Ages 1-5	Mental Health	Affect	Self-Regulation – Frustration Tolerance		Young children's recognition and regulation of emotions and behaviors in service of their goals (coping).
Proxy Ages 5-17	Mental Health	Affect	Emotional Distress – Anxiety		Fear (fearfulness, panic), anxious misery (worry, dread), hyperarousal (tension, nervousness, restlessness), social/separation anxiety (fear or distress when separating from caregivers), and somatic symptoms related to arousal (racing heart, dizziness).
Proxy Ages 5-17	Mental Health	Affect	Emotional Distress – Depressive Symptoms		Negative mood (sadness, guilt), views of self (self-criticism, worthlessness), and social cognition (loneliness, interpersonal alienation); decreased positive affect, anhedonia (loss of interest, inability to engage in play), and engagement.
Proxy Ages 5-17	Mental Health	Affect	Emotional Distress – Anger/Irritability		Angry mood (irritability, frustration, grouchiness), negative social cognitions (interpersonal sensitivity, envy, disagreeableness), behavior (tantrums), and efforts to control anger.
Proxy Ages 5-17	Mental Health	Affect	Life Satisfaction		Global and context-specific evaluations of a child’s life. Conceptual facets include global evaluations of life, context-specific evaluations of life, assessments of life conditions, and comparisons of one’s life with others’ lives.
Proxy Ages 5-17	Mental Health	Affect	Meaning and Purpose		A child's sense that life has purpose and there are good reasons for living, including hopefulness, optimism, goal-directedness, and feelings that one’s life is worthy.
Proxy Ages 5-17	Mental Health	Affect	Positive Affect		Momentary positive or rewarding affective experiences, such as feelings and mood associated with pleasure, joy, elation, contentment, pride, affection, happiness, engagement, and excitement.
Proxy Ages 5-17	Mental Health	Affect	Psychological Stress Experiences		The thoughts or feelings about self and the world in the context of environmental or internal challenges. Items represent 3 facets of psychological stress reactions: feeling overwhelmed, perceived lack of control of capacity to manage one’s life, and cognitive-perceptual disruption.
Proxy Ages 5-17	Mental Health	Cognition	Cognitive Function		Difficulties in cognitive abilities (e.g., memory, attention, and decision making), and difficulties in the application of such abilities to everyday tasks (e.g., planning, organizing, calculating, remembering, and learning).
Social Health
Adult	Social Health	Function	Ability to Participate in Social Roles and Activities		Perceived ability to perform one’s usual social roles and activities.
Adult	Social Health	Function	Satisfaction with Participation in Discretionary Social Activities (v1.0)		Contentment with leisure interests and relationships with friends.
Adult	Social Health	Function	Satisfaction with Participation in Social Roles (v1.0)		Satisfaction with performing one’s usual social roles and activities
Adult	Social Health	Function	Satisfaction with Social Roles and Activities (v2.0)		Satisfaction with performing one’s usual social roles and activities (e.g., “I am satisfied with my ability to participate in family activities”). Two preliminary item banks were created based on PROMIS Wave 1 data (2005-2007): Satisfaction with Participation in Social Roles (v1.0) and Satisfaction with Participation in Discretionary Social Activities (v1.0). Supplemental data collection (2009-20…
Adult	Social Health	Relationships	Social Isolation		Perceptions of being avoided, excluded, detached, disconnected from, or unknown by, others.
Adult	Social Health	Relationships	Companionship		Perceived availability of someone with whom to share enjoyable social activities such as visiting, talking, celebrations, etc.
Adult	Social Health	Relationships	Emotional Support		Perceived feelings of being cared for and valued as a person; having confidant relationships.
Adult	Social Health	Relationships	Informational Support		Perceived availability of helpful information or advice.
Adult	Social Health	Relationships	Instrumental Support		Perceived availability of assistance with material, cognitive or task performance.
Ages 8-17	Social Health	Relationships	Peer Relationships		Quality of relationships with friends and other acquaintances.
Ages 8-17	Social Health	Relationships	Family Relationships		The subjective (affective, emotional, cognitive) experience of being involved with one’s family, feeling like an important person in the family, of feeling accepted and cared for, and feeling that family members, especially parents, can be trusted and depended on for help and understanding.
Proxy Ages 1-5	Social Health	Relationships	Peer Relationships		Positive peer interactions, sociability (getting along well with others), and empathic behaviors.
Proxy Ages 1-5	Social Health	Relationships	Family Relationships		The subjective (affective, emotional, cognitive) experience of being involved with one’s family, feeling like an important person in the family, of feeling accepted and cared for, and feeling that family members, especially parents, can be trusted and depended on for help and understanding.
Proxy Ages 5-17	Social Health	Relationships	Peer Relationships		Positive peer interactions, sociability (getting along well with others), and empathic behaviors.
Proxy Ages 5-17	Social Health	Relationships	Family Relationships		The subjective (affective, emotional, cognitive) experience of being involved with one’s family, feeling like an important person in the family, of feeling accepted and cared for, and feeling that family members, especially parents, can be trusted and depended on for help and understanding.
Global Health
Adult	Global		Global Health*		Overall evaluation of one's physical and mental health.	*Global Health is scored into physical and mental health summary scores.
Adult	Global		Global Mental		Overall evaluation of one's mental health.
Adult	Global		Global Physical		Overall evaluation of one's physical health.
Ages 8-17	Global		Global Health		Overall evaluation of one's physical and mental health.
Proxy Ages 5-17	Global		Global Health		Overall evaluation of physical, mental health, and social health.
Profiles
Adult	Profile		PROMIS-29 Profile (v2.1)		A collection of 4-item short forms assessing anxiety, depression, fatigue, pain interference, physical function, sleep disturbance, and ability to participate in social roles and activities as well as a single pain intensity item.
Adult	Profile		PROMIS-29+2 Profile v2.1 (PROPr)		Consists of the PROMIS 29+2 Profile v2.1 and two (2) PROMIS Cognitive Function Abilities items. This measure was created to incorporate the PROMIS Preference Scoring System.
Adult	Profile		PROMIS Profile CAT v1.0 – 29		A collection of 8 computer adaptive tests (CATs) assessing anxiety, depression, fatigue, pain interference, physical function, sleep disturbance, and ability to participate in social roles and activities as well as a single pain intensity item.
Adult	Profile		PROMIS-43 Profile (v2.1)		A collection of 6-item short forms assessing anxiety, depression, fatigue, pain interference, physical function, sleep disturbance, and ability to participate in social roles and activities as well as a single pain intensity item.
Adult	Profile		PROMIS-57 Profile (v2.1)		A collection of 8-item short forms assessing anxiety, depression, fatigue, pain interference, physical function, sleep disturbance, and ability to participate in social roles and activities as well as a single pain intensity item.
Adult	Profile		Sexual Function and Satisfaction v2.0 Brief Profile (Female)		A collection of brief (1-2) item short forms assessing interest in sexual activity, orgasm, satisfaction with sex life, lubrication, and vaginal discomfort, vulvar discomfort.
Adult	Profile		Sexual Function and Satisfaction v2.0 Brief Profile (Male)		A collection of brief (1-2) item short forms assessing interest in sexual activity, orgasm, satisfaction with sex life, and erectile function.
Adult	Profile		Sexual Function and Satisfaction v2.0 Full Profile (Female)		A collection of brief (1-3) item short forms assessing interest in sexual activity, orgasm, satisfaction with sex life, lubrication, vaginal discomfort, vulvar discomfort, oral discomfort, oral dryness, and anal discomfort.
Adult	Profile		Sexual Function and Satisfaction v2.0 Full Profile (Male)		A collection of brief (1-3) item short forms assessing interest in sexual activity, orgasm, satisfaction with sex life, erectile function, oral discomfort, oral dryness, and anal discomfort.
Ages 8-17	Profile		PROMIS Pediatric Profile 25		A collection of 4-item short forms assessing anxiety, depressive symptoms, fatigue, pain interference, physical function-mobility, and peer relationships as well as a single pain intensity item.
Ages 8-17	Profile		PROMIS Pediatric Profile 37		A collection of 6-item short forms assessing anxiety, depressive symptoms, fatigue, pain interference, physical function-mobility, and peer relationships as well as a single pain intensity item.
Ages 8-17	Profile		PROMIS Pediatric Profile 49		A collection of 8-item short forms assessing anxiety, depressive symptoms, fatigue, pain interference, physical function-mobility, and peer relationships as well as a single pain intensity item.
Proxy Ages 5-17	Profile		PROMIS Parent Proxy Profile 25		A collection of 4-item short forms assessing anxiety, depressive symptoms, fatigue, pain interference, physical function-mobility, and peer relationships as well as a single pain intensity item.
Proxy Ages 5-17	Profile		PROMIS Parent Proxy Profile 37		A collection of 6-item short forms assessing anxiety, depressive symptoms, fatigue, pain interference, physical function-mobility, and peer relationships as well as a single pain intensity item.
Proxy Ages 5-17	Profile		PROMIS Parent Proxy Profile 49		A collection of 8-item short forms assessing anxiety, depressive symptoms, fatigue, pain interference, physical function-mobility, and peer relationships as well as a single pain intensity item.

## Sheet: Sorts
Physical Health
Physical Health - Cancer
Mental Health
Mental Health - Cancer
Social Health
Global
Profile
Adult
Ages 8-17
Proxy Ages 1-5
Proxy Ages 5-17
